# Supplementary material for: Photoluminescent Gold/BSA Nanoclusters (AuNC@BSA) as Sensors for Red-Fluorescence Detection of Mycotoxins
Source: MDPI journal article supplement (doi:10.3390/ma15238448), 2022-11-27
Supplement: s1 [file s1]

Supporting information

# Photoluminescent Gold/BSA Nanoclusters (AuNC@BSA) as Sensors for Red-Fluorescence Detection of Mycotoxins

Ivana Fabijanić <sup>1</sup>, Marta Jurković <sup>1</sup>, Daniela Jakšić <sup>2</sup> and Ivo Piantanida <sup>1,\*</sup>

**Figure S1.** Size distribution of AuNC@BSA.

**Figure S2.** UV/Vis spectrum and excitation spectrum of AuNC@BSA.

**Table S1.** Lifetime data obtained by measuring lifetime decay of AuNC@BSA at 273 K at different pH values.

**Figure S3.** Fluorescent emission data of HSA upon titration with STC.

**Figure S4.** Fluorescent emission data of BSA upon titration with FBi.

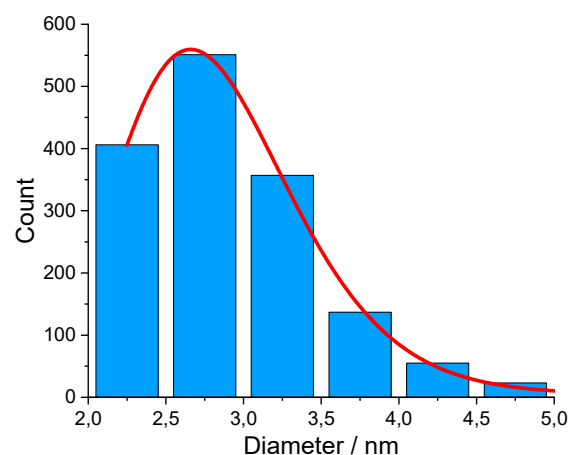

**Figure S1.** Size distribution of AuNC@BSA. The average nanocluster diameter measured from TEM images using ImageJ software [1] is  $2.8 \pm 0.2$  nm.

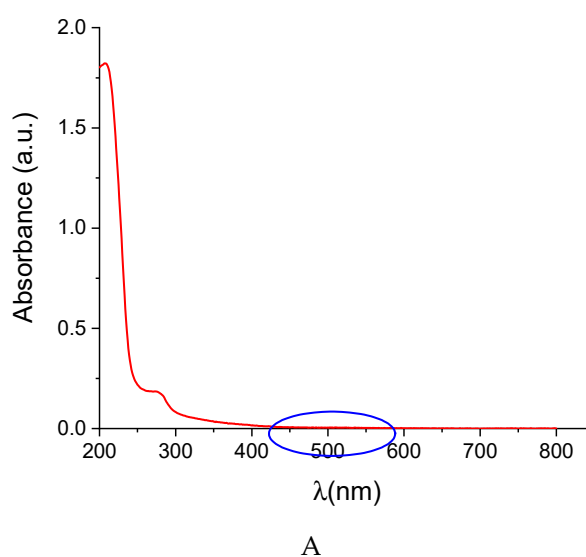

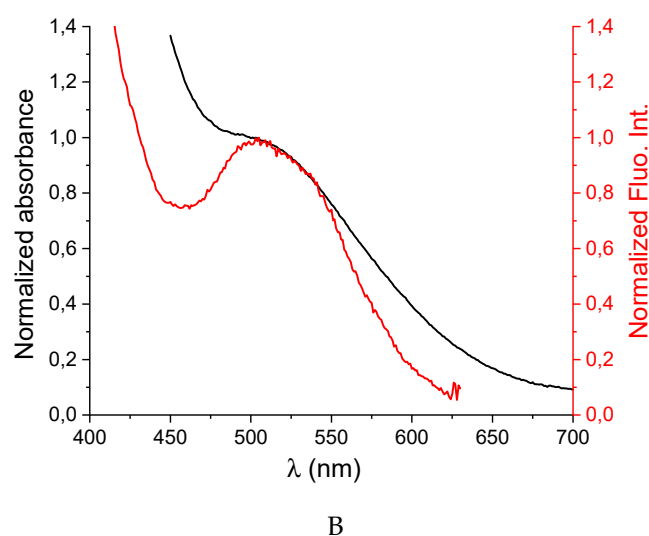

**Figure S2.** A) UV/Vis spectrum of AuNC@BSA in water; B) Enlarged area of A) marked by blue circle: UV/Vis spectrum (**black** line) and excitation spectrum (**red** line -  $\lambda_{em}=680$  nm) of AuNC@BSA in water.

**Table S1.** Lifetime data obtained by measuring lifetime decay of AuNC@BSA at 273 K.

|          | AuNC@BSA<br>(ELED340)/ns |       |                          |       |                          |       | AuNC@BSA**<br>(ELED560)/ns |       |                            |       |
|----------|--------------------------|-------|--------------------------|-------|--------------------------|-------|----------------------------|-------|----------------------------|-------|
|          | pH = 7.3*                |       | pH = 10.3                |       | pH = 12                  |       | pH = 10.3                  |       | pH = 12                    |       |
|          | $\tau$                   | Rel/% | $\tau$                   | Rel/% | $\tau$                   | Rel/% | $\tau$                     | Rel/% | T                          | Rel/% |
| $\tau_1$ | 24.30<br>( $\pm 10.18$ ) | 0.42  | 169.8<br>( $\pm 31.74$ ) | 2.24  | 168.1<br>( $\pm 25.99$ ) | 2.81  | 8.569<br>( $\pm 1.982$ )   | 0.24  | 54.68<br>( $\pm 9.0141$ )  | 0.85  |
| $\tau_2$ | 607.3<br>( $\pm 45.21$ ) | 15.86 | 877.9<br>( $\pm 100.3$ ) | 33.47 | 833.4<br>( $\pm 77.03$ ) | 32.16 | 366.5<br>( $\pm 26.51$ )   | 8.63  | 579.497<br>( $\pm 62.86$ ) | 19.97 |
| $\tau_3$ | 1849<br>( $\pm 36.88$ )  | 83.72 | 1891<br>( $\pm 122.8$ )  | 64.29 | 1812<br>( $\pm 73.36$ )  | 65.03 | 1446<br>( $\pm 27.03$ )    | 91.13 | 1637<br>( $\pm 109.9$ )    | 79.18 |
| $\chi^2$ | 1.0001                   |       | 0.9914                   |       | 0.9892                   |       | 1.0070                     |       | 1.0502                     |       |

\* 4  $\mu$ L of stock solution of AuNC@BSA (pH = 12) in 2 mL of ultrapure water has pH = 7.3. The BSA concentration in a cuvette is  $7.15 \times 10^{-7}$  M.

\*\* measurements done with the stock solution ( $c(\text{BSA}) = 3.58 \cdot 10^{-4}$  M or  $c(\text{Au}_{25}, \text{AuNC@BSA}) = 190$   $\mu$ M).

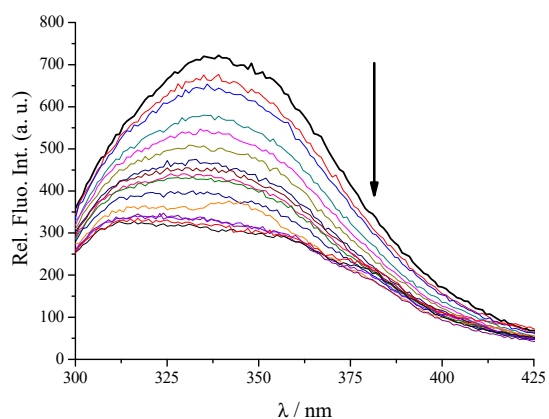

A)

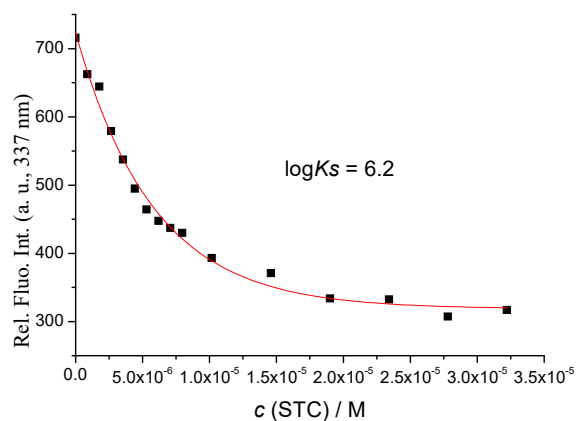

B)

**Figure S3.** A) Changes in HSA emission spectra ( $c = 1 \times 10^{-6}$  M,  $\lambda_{\text{exc}} = 280$  nm) upon titration with STC ( $c_{\text{stock}} = 9 \times 10^{-3}$  M, in MeCN). B) emission changes at  $\lambda = 337$  nm fitted to the 1:1 stoichiometry complex (—). Performed at pH 7.0, Na-cacodylate buffer,  $I = 0.05$  M.

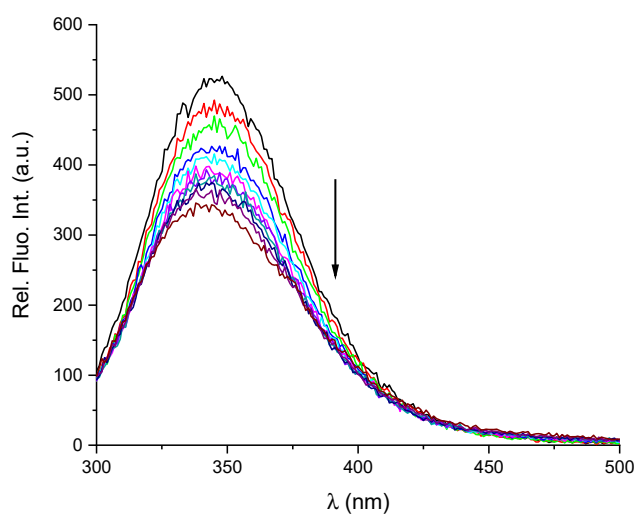

A)

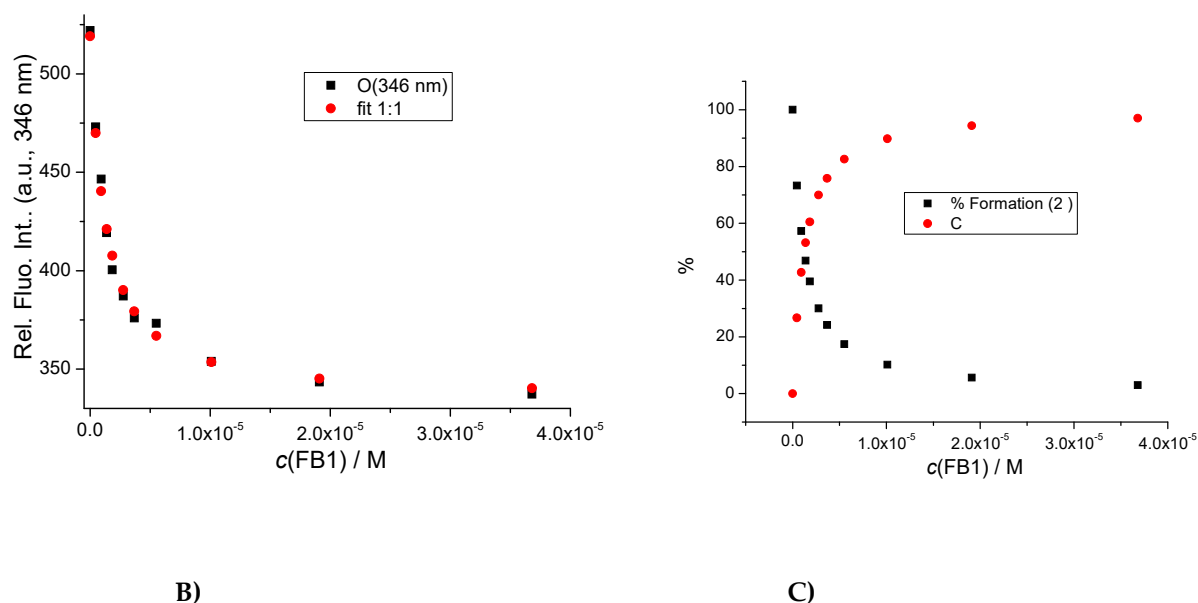

**Figure S4.** **A)** Fluorescent emission spectra of BSA ( $c(\text{BSA}) = 1.86 \cdot 10^{-7} \text{ M}$  in a cuvette) upon titration with  $\text{FB1}$  in water ( $\lambda_{\text{exc}} = 280 \text{ nm}$ , slit: 10 10) at 298 K. Specfit [2] parameters for fluorimetric titration of BSA with  $\text{FB1}$ . **B)** Emission dependence of BSA on  $c(\text{FB1})$  at  $\lambda_{\text{max}} = 346 \text{ nm}$  (black squares – experimental data, red diamonds – fit for 1: 1 (BSA:  $\text{FB1}$ ) stoichiometry). **C)** distribution of spectroscopically active species (black squares - free BSA, red diamonds - BSA- $\text{FB1}$  complex in 1:1 stoichiometry).

1. Schneider, C. A., Rasband, W. S., & Eliceiri, K. W. (2012). NIH Image to ImageJ: 25 years of image analysis. *Nature Methods*, 9(7), 671–675. doi:10.1038/nmeth.2089
2. SPECFIT GLOBAL ANALYSIS, a Program for Fitting, Equilibrium and Kinetic Systems, using Factor Analysis & Marquardt Minimization; Maeder, M., Zuberbuhler, A. D. Nonlinear Least-Squares Fitting of Multivariate Absorption Data, *Anal. Chem.* 1990, 62, 2220-2224
